# Supplementary material
Source: MDPI journal article supplement (https://www.mdpi.com/2073-4344/10/9/1074)
Supplement: s1 [file s1]

Supplementary Materials: Effect of Synthesis Conditions of Nitrogen and Platinum Co-Doped Titania Films on the Photocatalytic Performance under Simulated Solar Light

Daryna Ihnatiuk 1,2 Camilla Tossi 1, Ilkka Tittonen 1 and Oksana Linnik 3,*

|  |  |
| --- | --- |
| a | b |
|  | |
| c | |

**Figure S1.** Absorption spectra of the films obtained by *Method 1* (**a**) and *Method 2* (**b**) 0.5mol%Pt -doped films: TiO2 (1), Pt-TiO2 (2), Pt-TiO2UV (3), Pt,N-TiO2 (4), Pt,N-TiO2UV (5). Emission spectra (**c**) of a 1000 W middle-pressure mercury lamp without (1) and with (2) the cut-off filter, the solar radiation spectrum is shown in curve (3).

|  |  |
| --- | --- |
| a | b |

**Figure S2.** Tauc plots of the films obtained by *Method 1* (**a**) and *Method 2* (**b**) TiO2 (1) and N-TiO2 (2) films.

**Figure S3.** XRD patterns of N-TiO2 films obtained by *Method 1* (1) and *Method 2* (2): a-anatase and b-brookite.

| 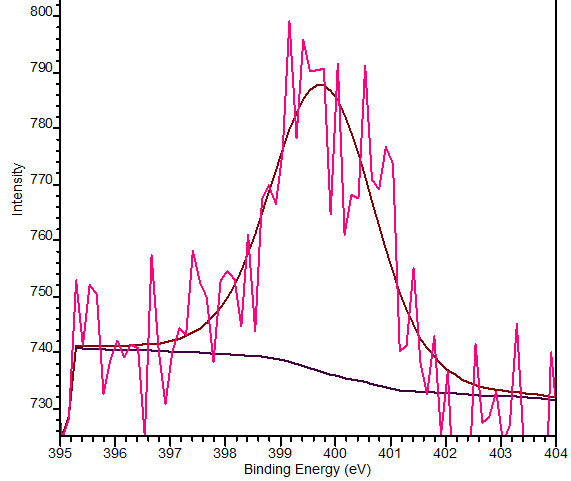 | 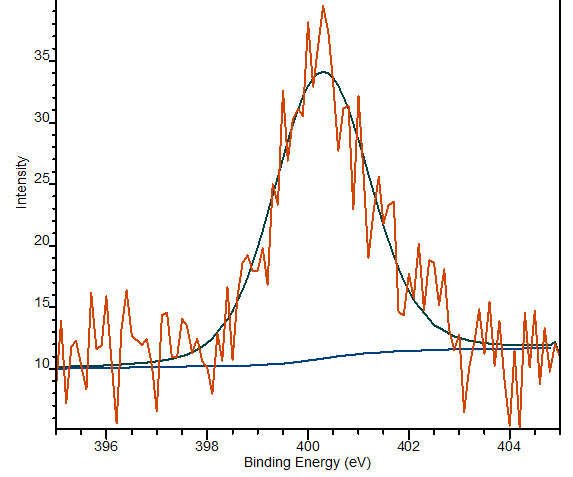 |
| --- | --- |
| N1s | |
| 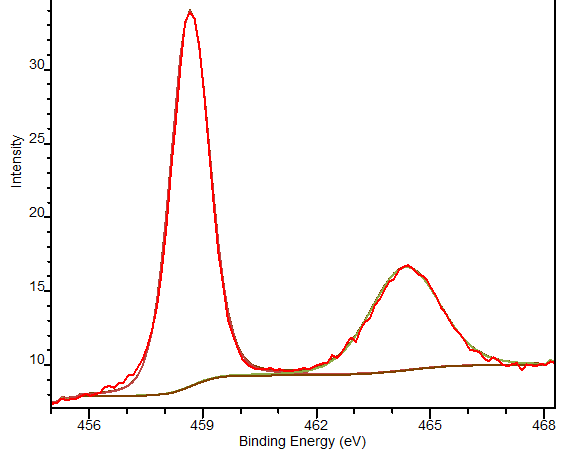 | 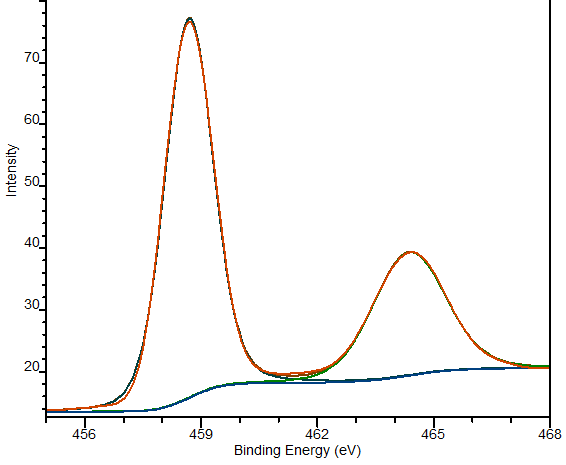 |
| Ti2p | |
| 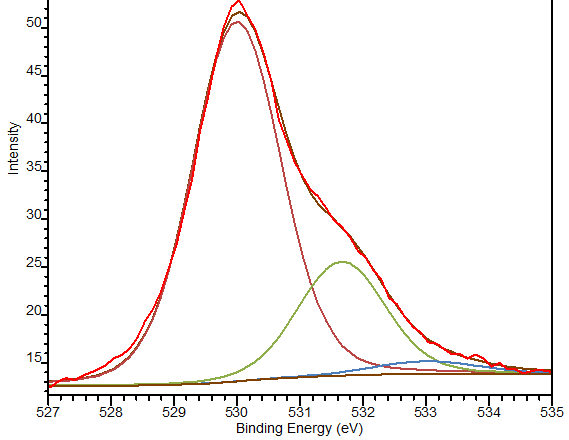 | 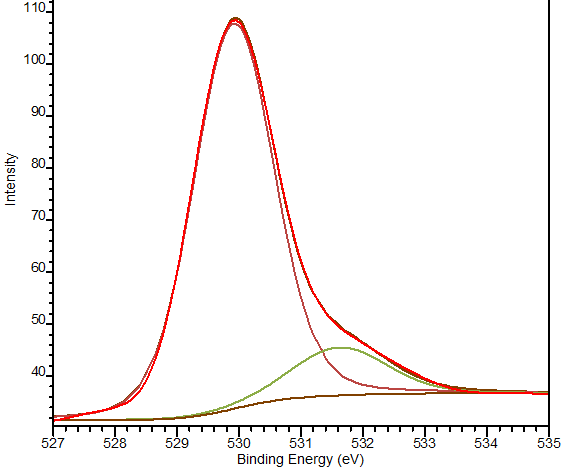 |
| O1s | |

**Figure S4.** N1s, Ti2p and O1s XPS spectra of the N-TiO2 films obtained by *Method 1* (left) and *Method 2* (right).

| 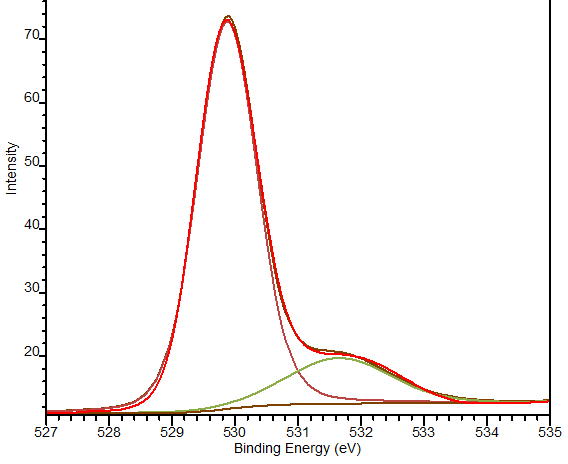  1Pt-TiO2M1 | 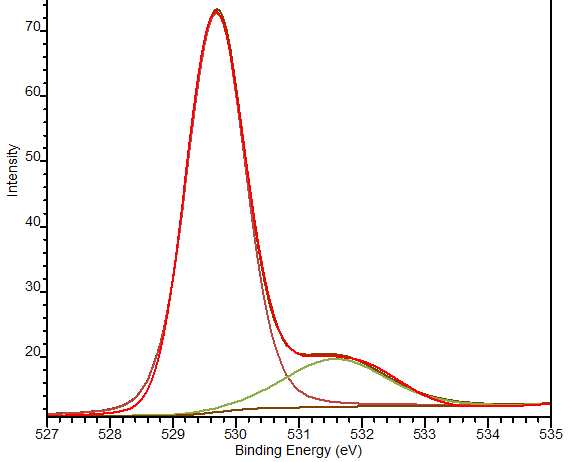  1Pt,N-TiO2M1 |
| --- | --- |
| 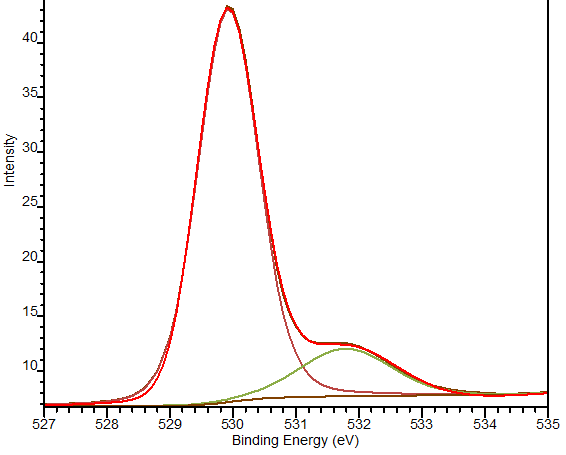  1Pt-TiO2M1UV | 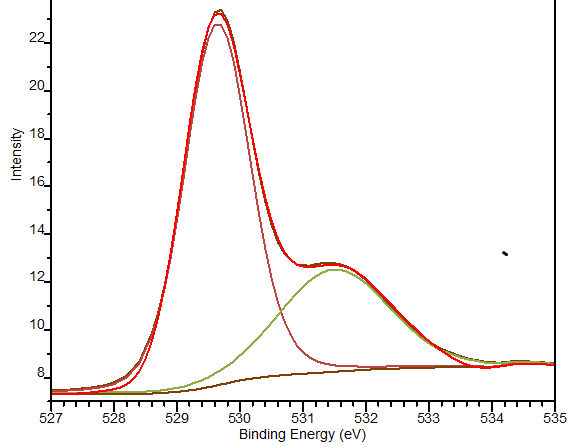  1Pt,N-TiO2M1UV |
| 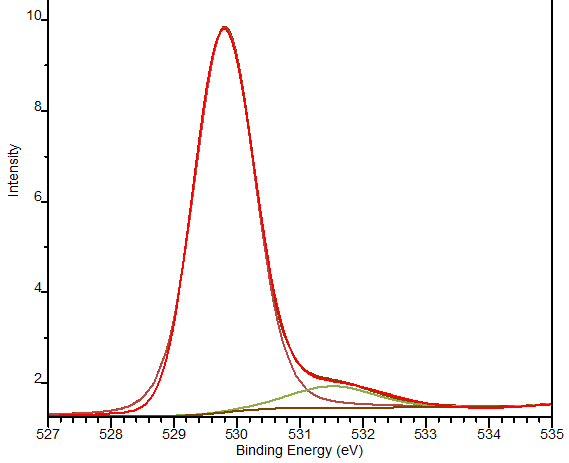  1Pt-TiO2M2 | 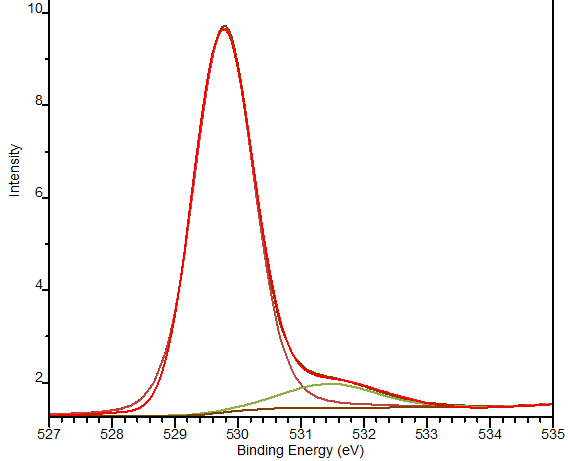  1Pt,N-TiO2M2 |
| 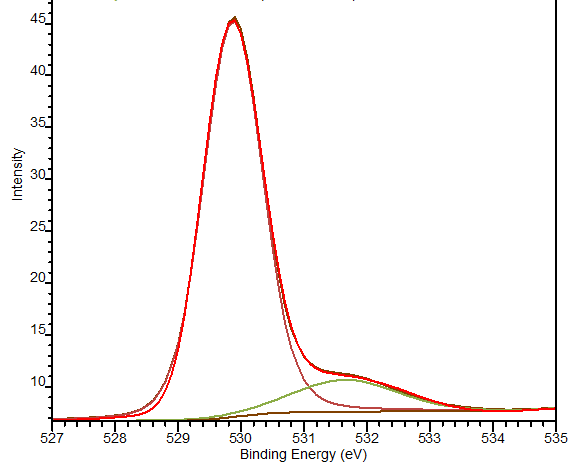  1Pt-TiO2M2UV | 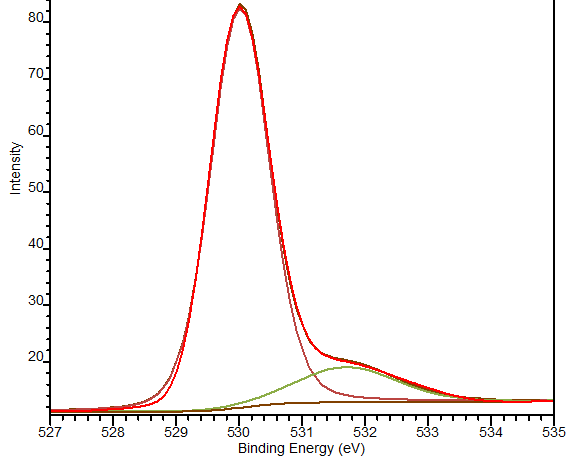1Pt,N-TiO2M2UV |

**Figure S5.** Deconvoluted XPS O1s spectra of Pt and Pt,N co-doped titania films.

**Table S1.** Binding energy values of Pt4f XPS spectra.

| **Film** | **Pt0** | | **Pt2+** | | **Pt0** | | **Pt2+** | | Pt4+ | |
| --- | --- | --- | --- | --- | --- | --- | --- | --- | --- | --- |
| **Pt4f7/2** | **Pt4f5/2** | **Pt4f7/2** | **Pt4f5/2** | **Pt4f7/2** | **Pt4f5/2** | **Pt4f7/2** | Pt4f5/2 | Pt4f7/2 | Pt4f5/2 |
| ***Method 1*** | | | | ***Method 2*** | | | | | |
| **0.5Pt-TiO2** | **70.2** | **73.5** | **71.0**  **72.4** | **74.4**  **75.8** | **-** | **-** | **72.3** | 75.7 |  |  |
| 0.5Pt,N-TiO2 | 70.8 | 74.1 | 72.4 | 75.8 | 70.6 | 74.0 | 72.3 | 75.6 | - | - |
| 0.5Pt-TiO2UV | 70.7 | 74.0 | 72.5 | 75.9 | - | - | 72.4 | 75.8 | 74.2 | 77.6 |
| 0.5Pt,N-TiO2UV | 71.0 | 74.3 | 72.1 | 75.4 | 70.6 | 74.0 | 72.3 | 75.7 | - | - |
| 1Pt-TiO2 | 71.4 | 74.7 | 72.1 | 75.4 | - | - | 72.0 | 75.4 | - | - |
| 1Pt,N-TiO2 | 70.4 | 73.7 | 72.0 | 75.3 | 70.5 | 73.8 | 71.2  72.5 | 74.6  75.8 | 74.3 | 77.6 |
| 1Pt-TiO2UV | 70.3 | 73.6 | 71.1 | 74.4 | - | - | 72.3 | 75.6 | 74.3 | 77.6 |
| 1Pt,N-TiO2UV | 69.6 | 73.0 | 71.4 | 74.7 | 70.8 | 74.2 | 72.5 | 75.8 | 74.6 | 78.0 |

| 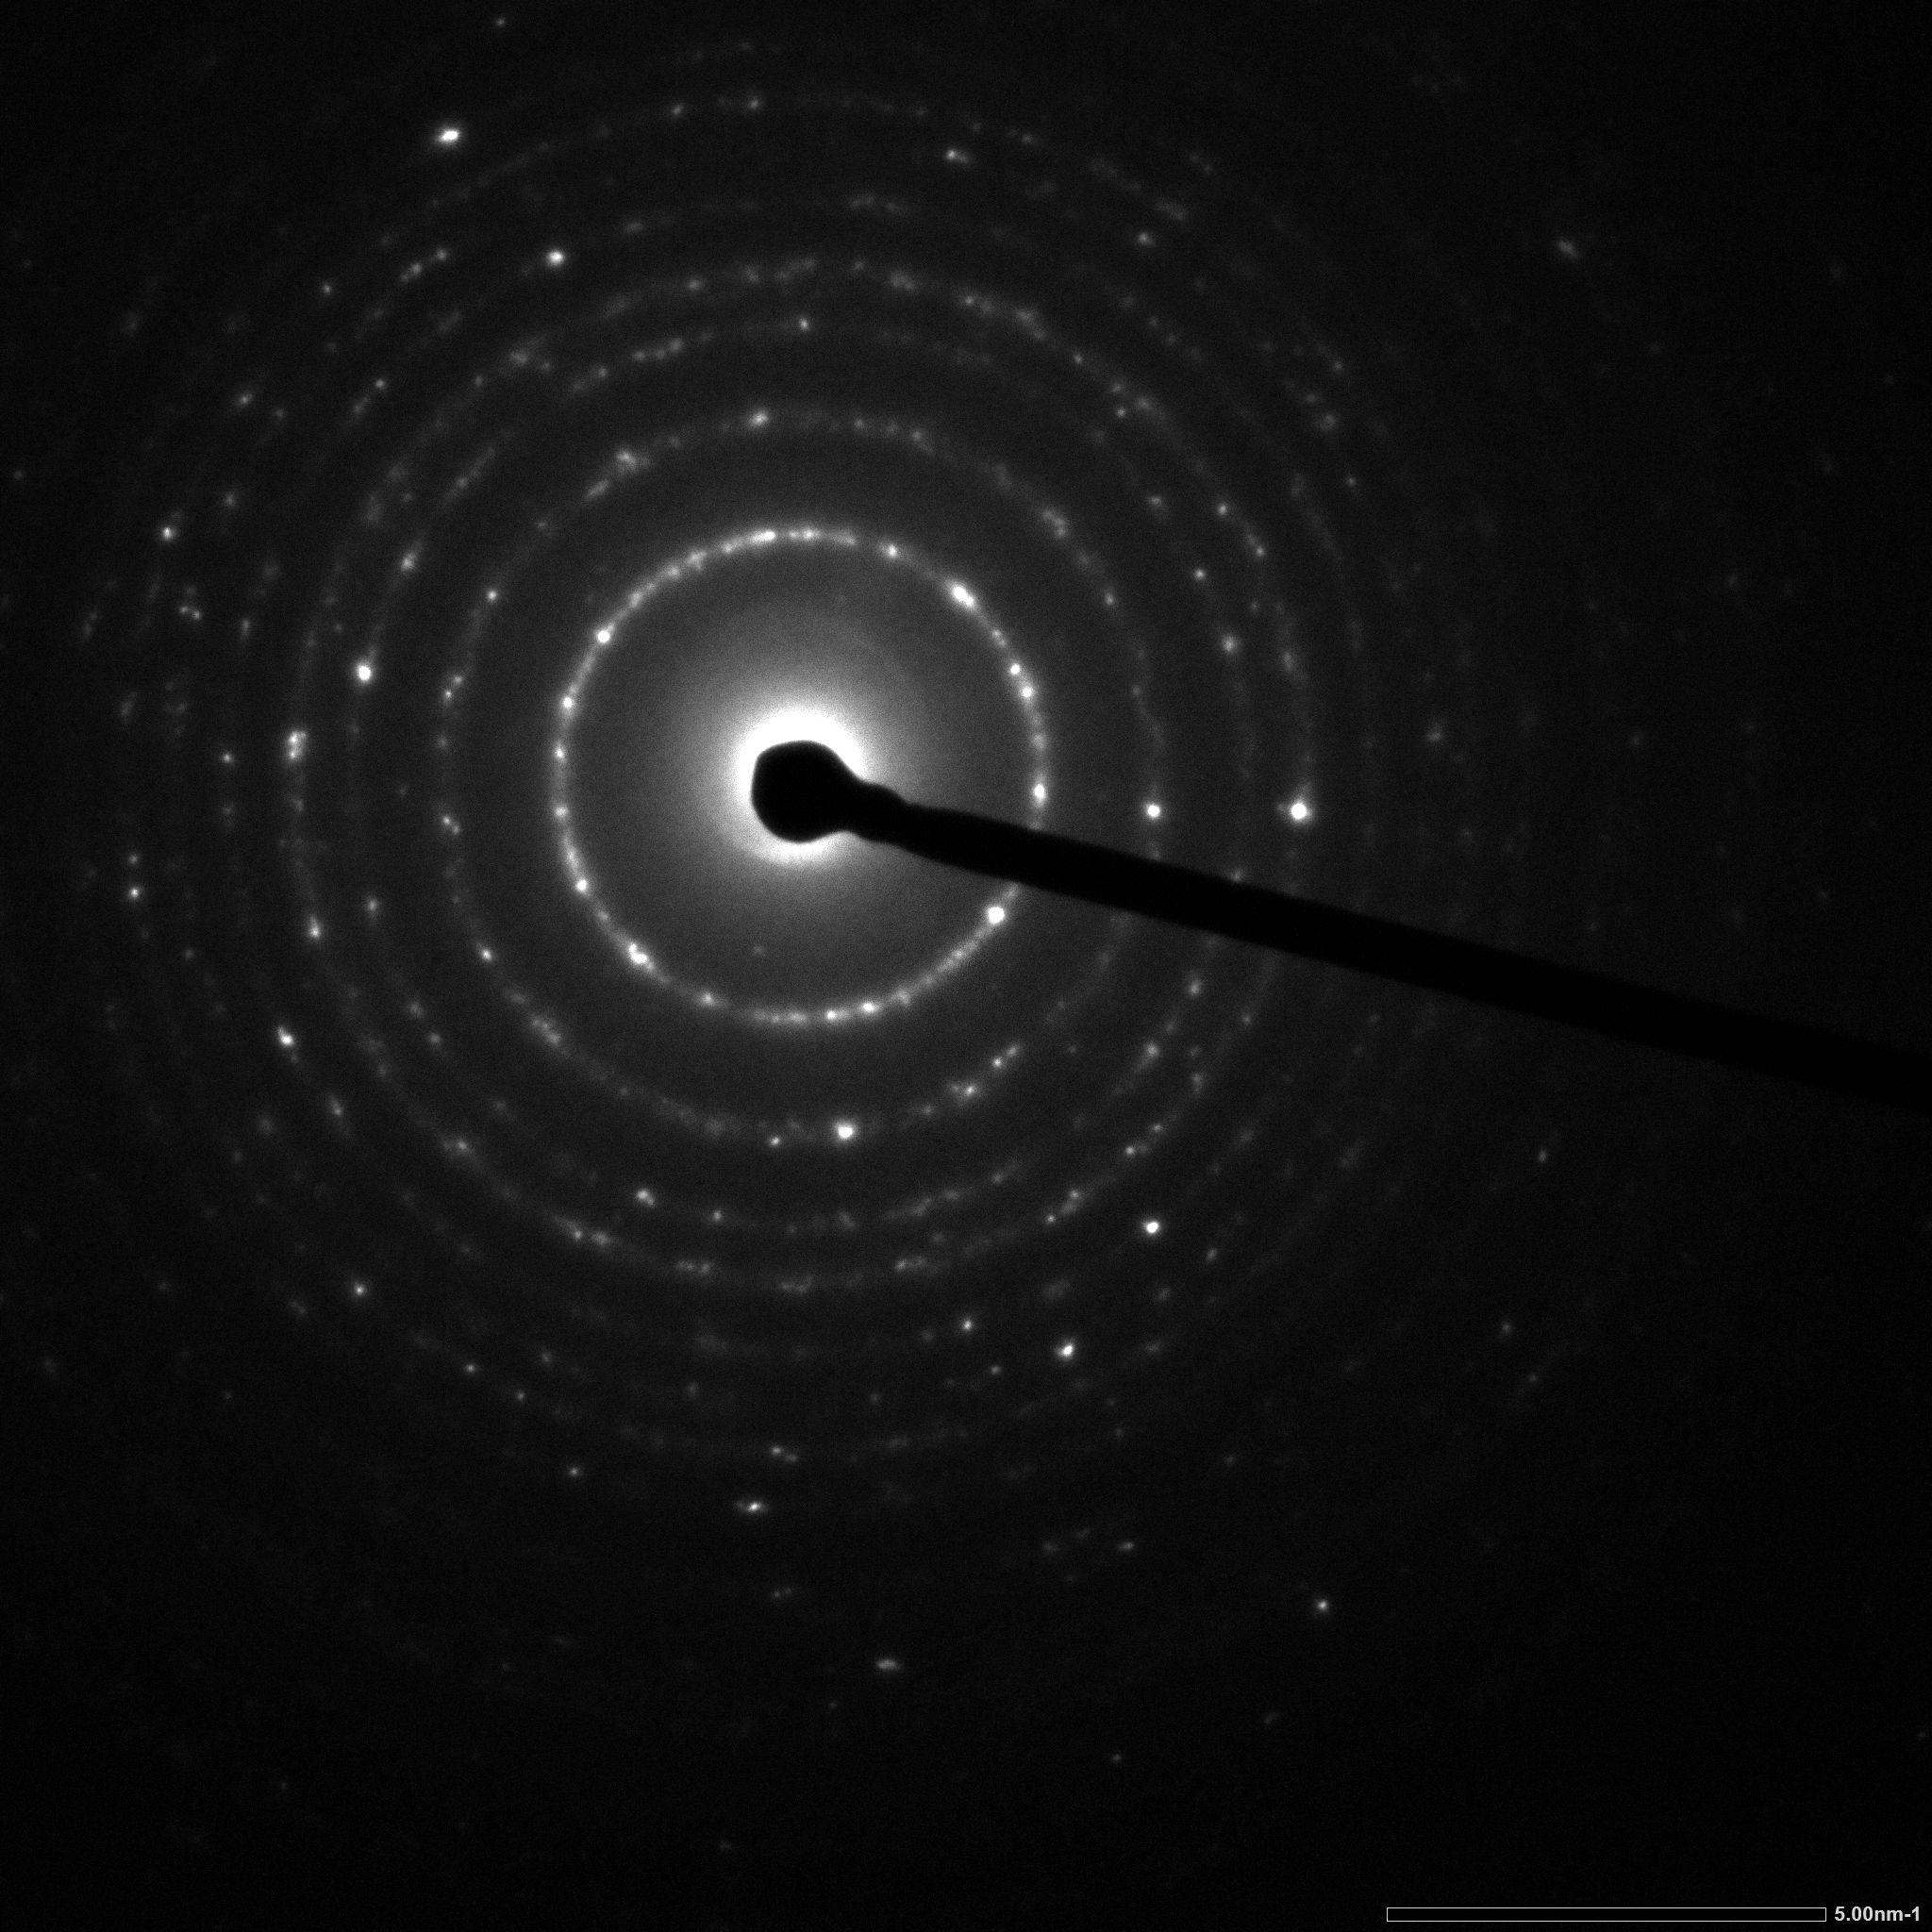 | 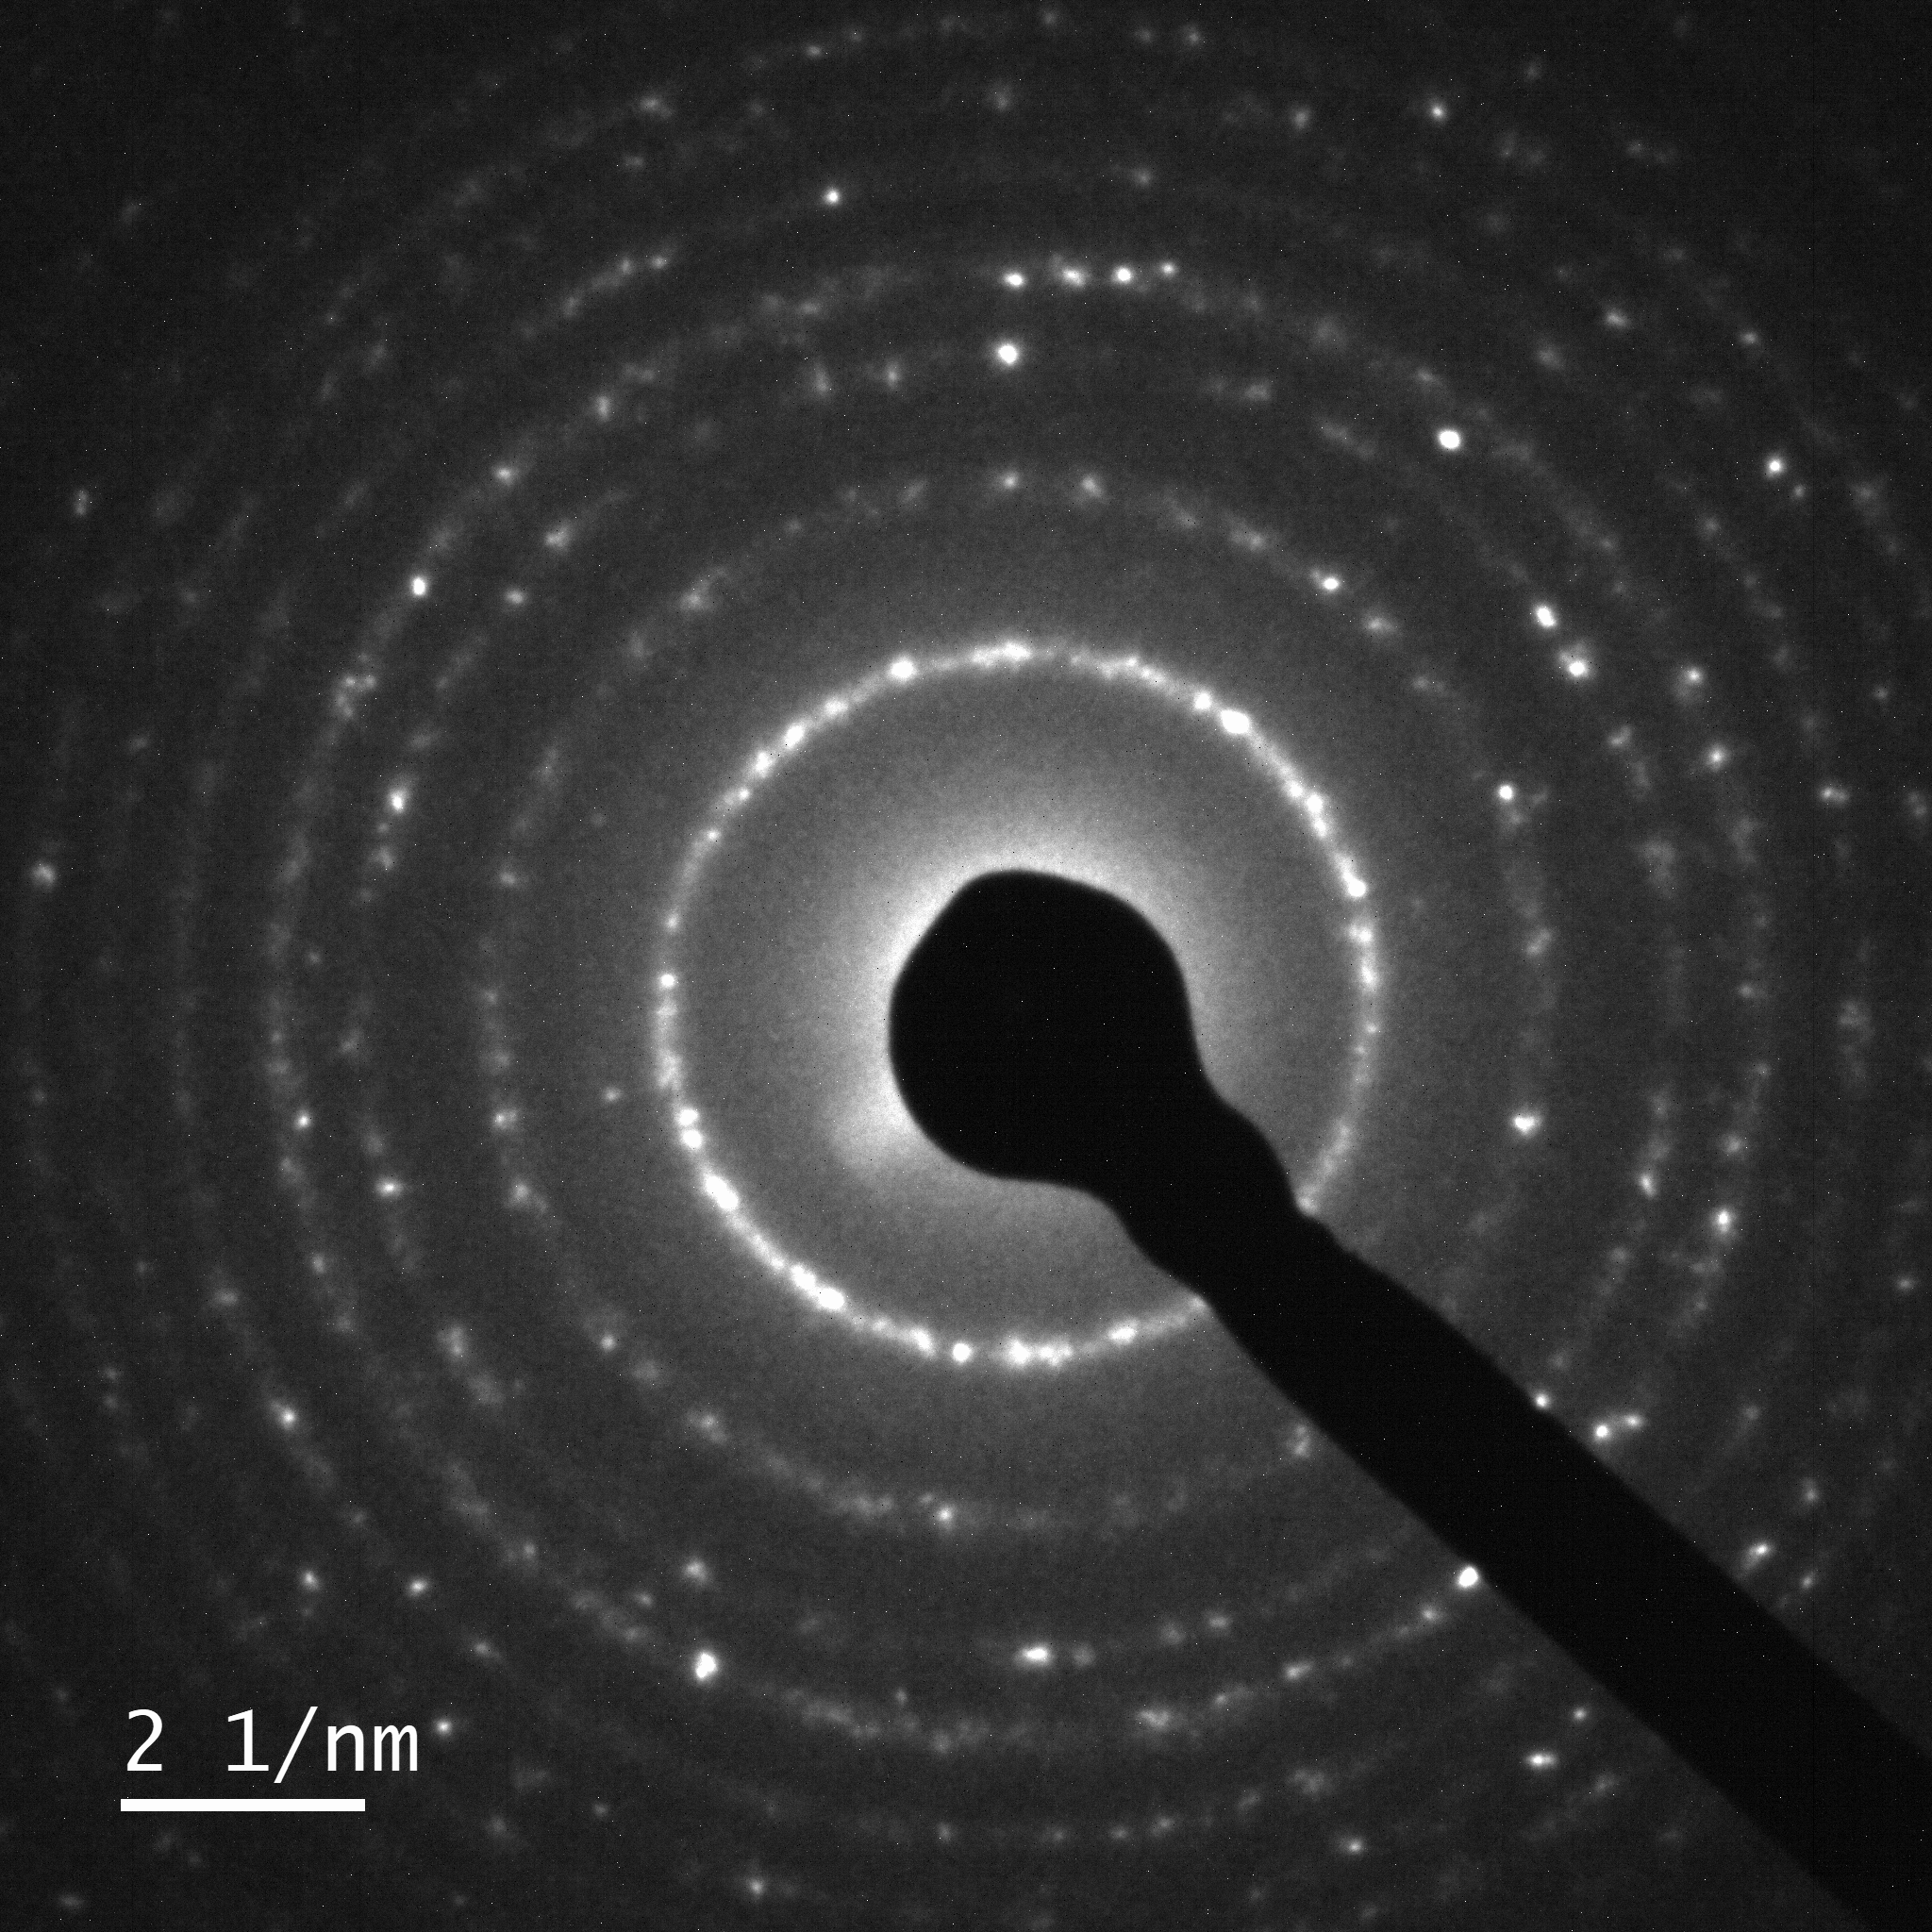 | 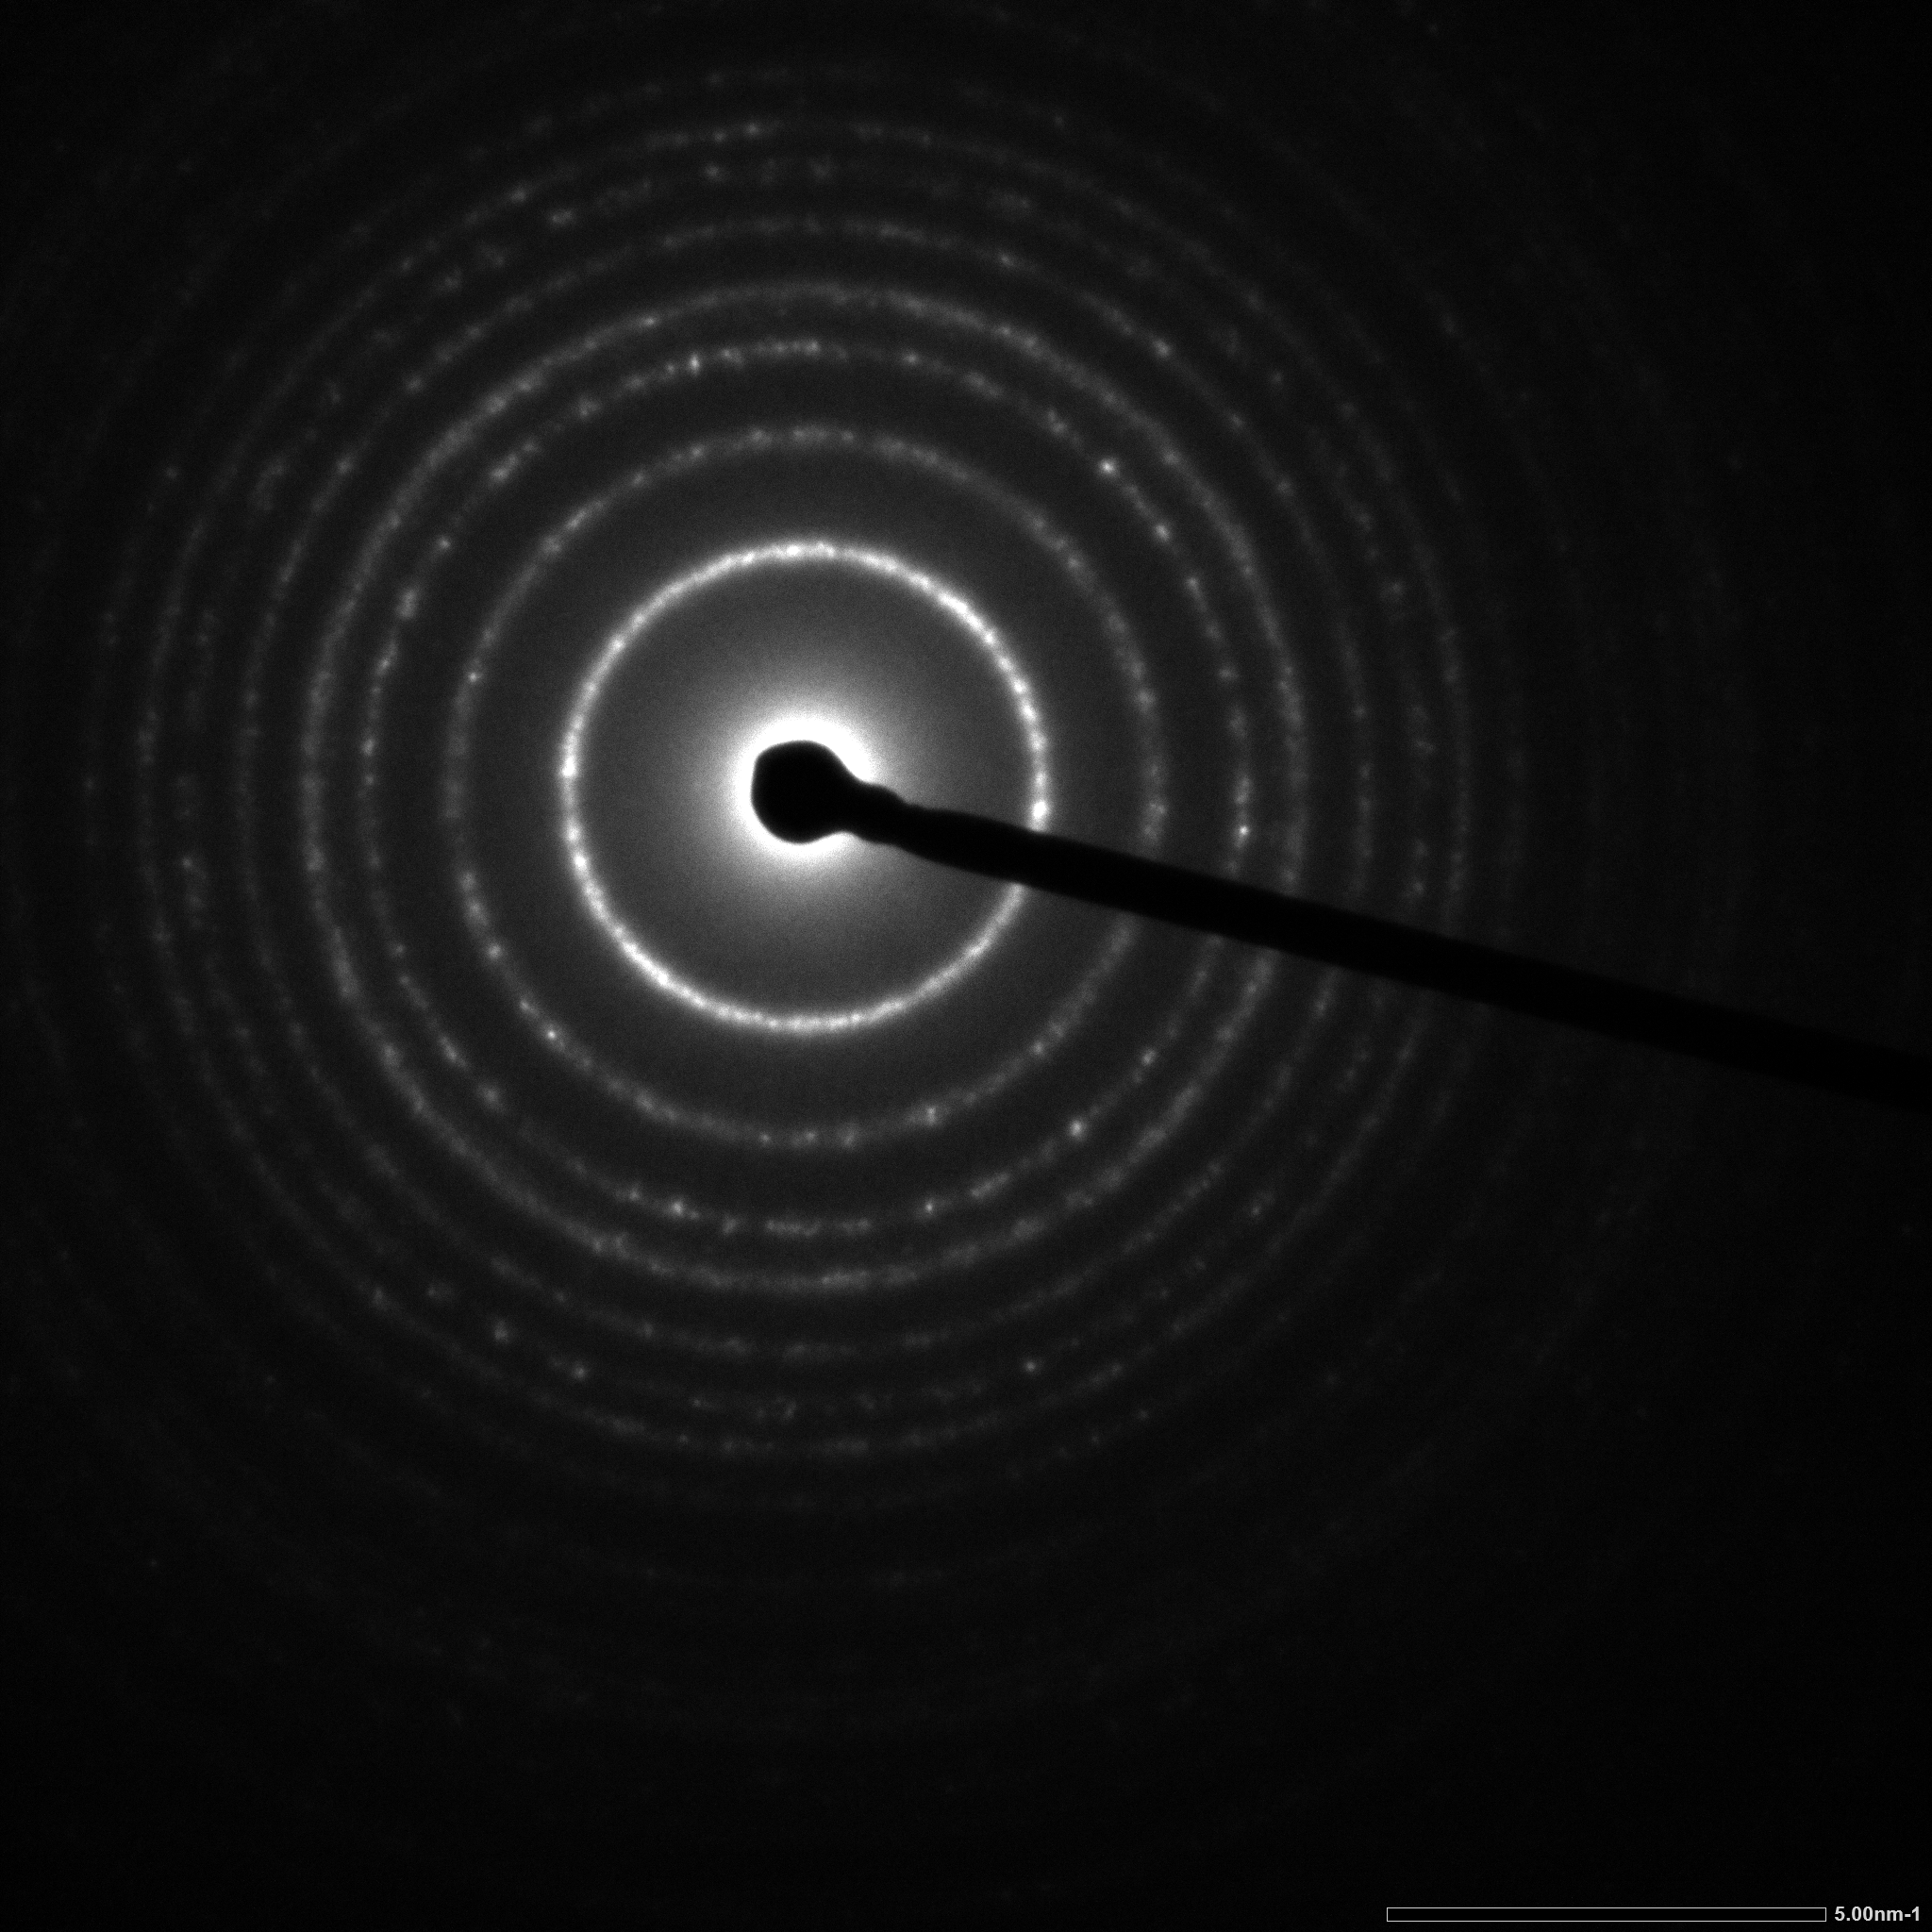 |
| --- | --- | --- |
| (a) | (b) | (c) |
| 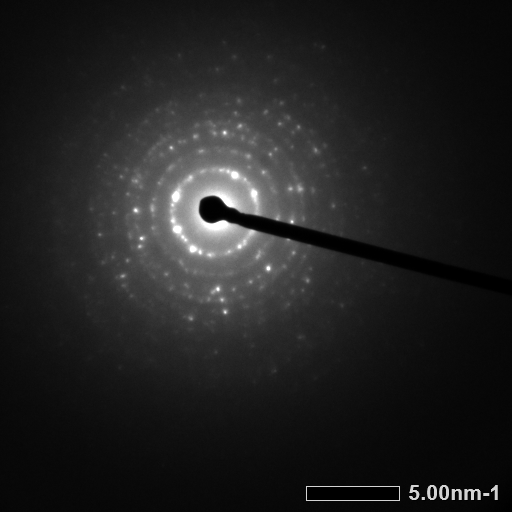 | 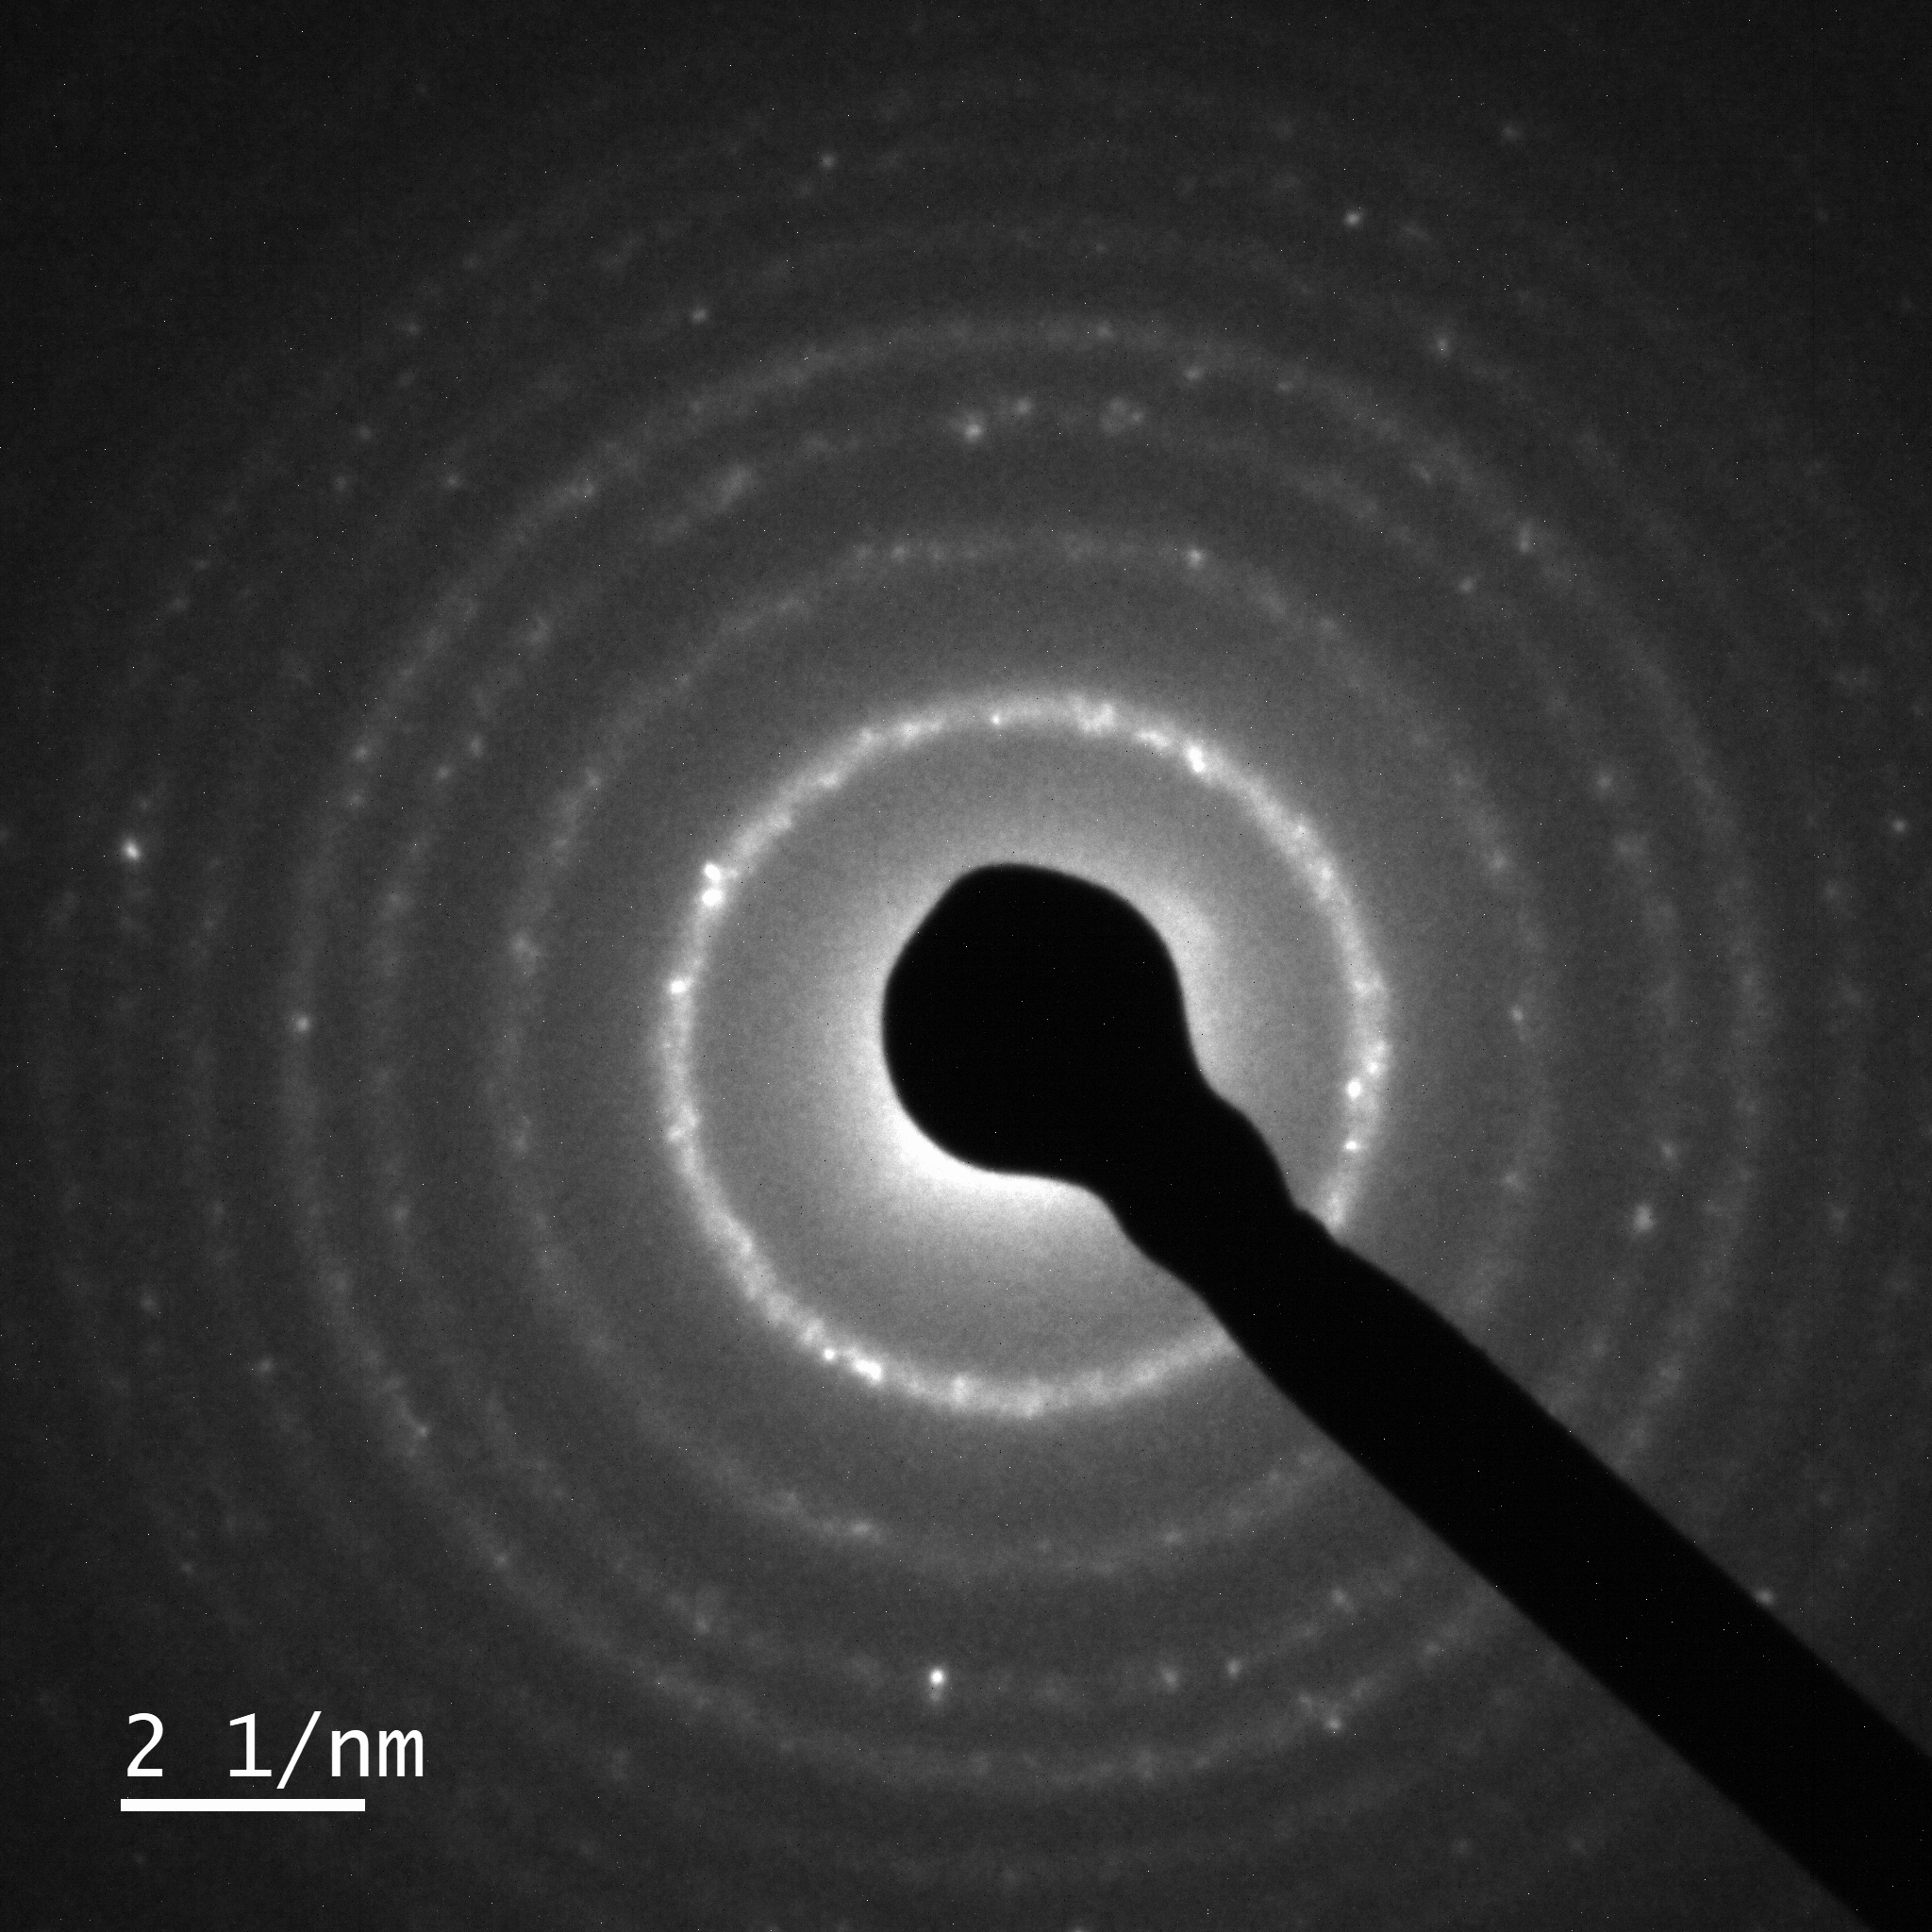 | 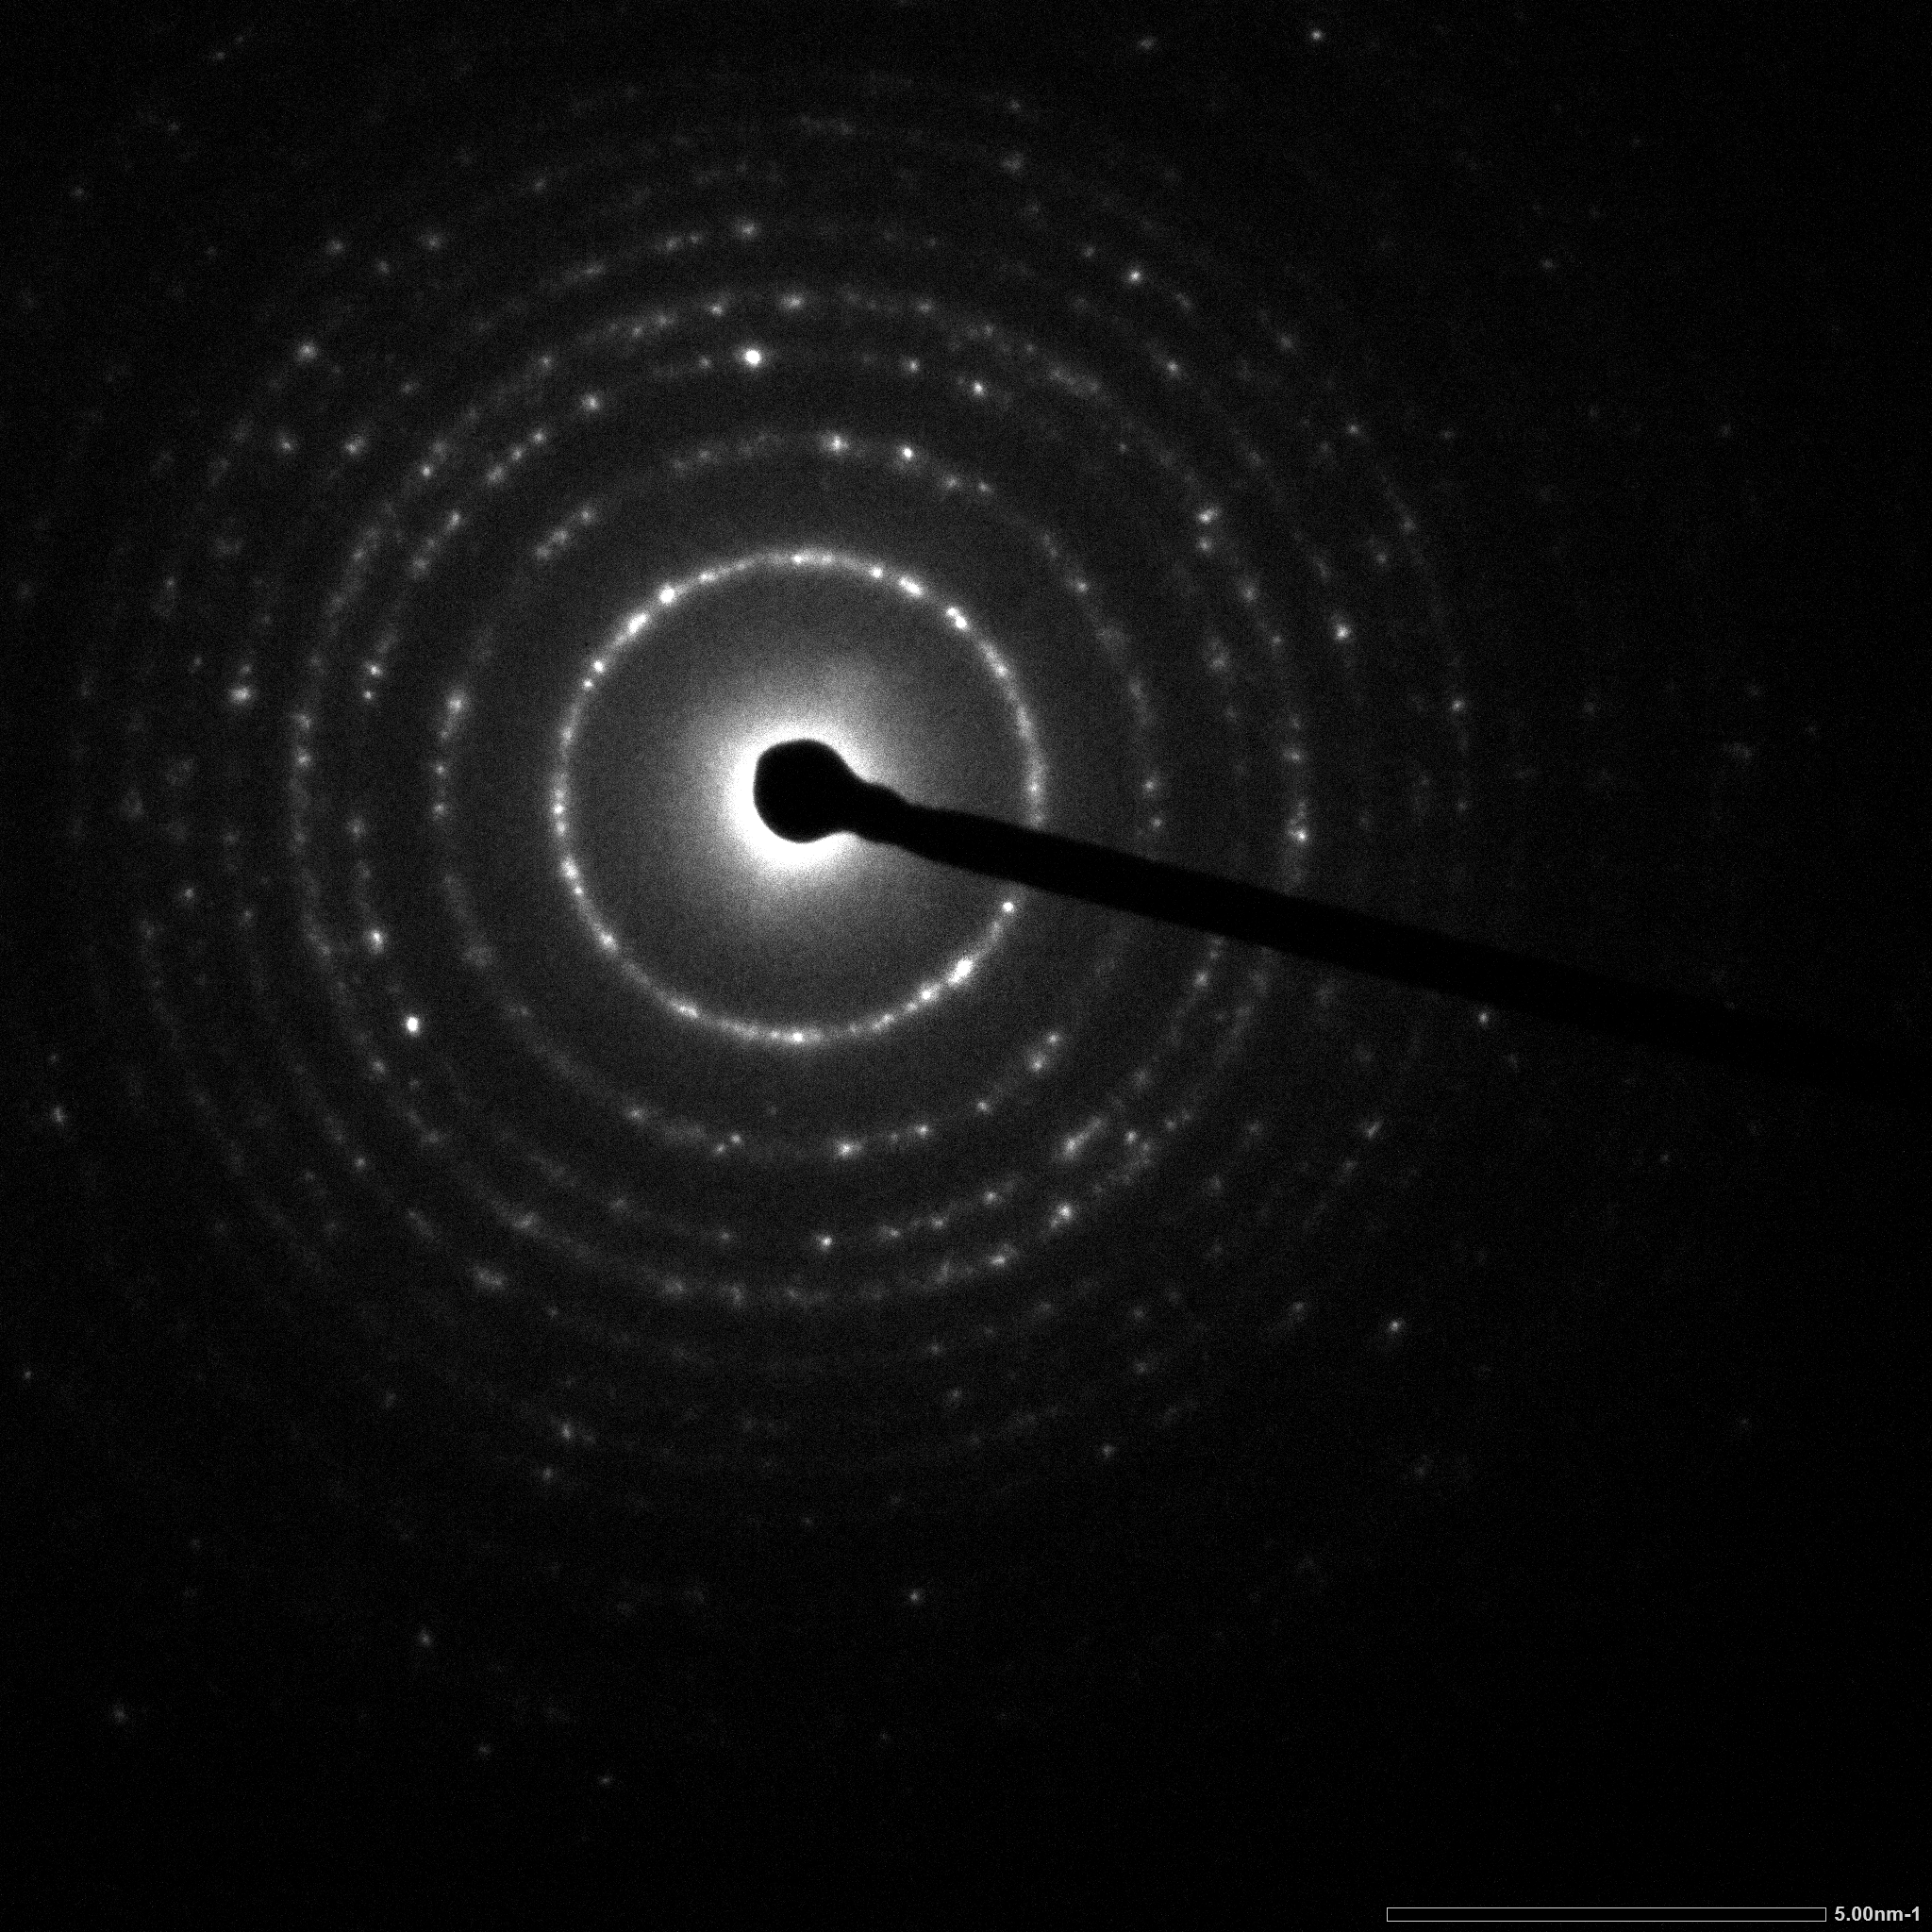 |
| (d) | (e) | (f) |

**Figure S6.** (**a**) 1%Pt-TiO2M2; (**b**) 1%Pt-TiO2M1; (**c**) 1%Pt-TiO2M1UV; (**d**) 1%Pt,N-TiO2M2; (**e**) 1%Pt,N-TiO2M1; (**f**) 1%Pt,N-TiO2M1UV.
